# Supplementary material for: MPLEx: a method for simultaneous pathogen inactivation and extraction of samples for multi-omics profiling
Source: Royal Society of Chemistry journal article supplement (doi:10.1039/c6an02486f), 2017-01-01
Supplement: c6an02486f2.xlsx [file c6an02486f2.xlsx]

## Sheet: Bacteria
Table S1. MPLEx Inactivation of Bacterial Pathogens
(value included in manuscript)	Yersinia pestis		Yersinia pestis- in macrophages		Y. enterocolitica (not included in manuscript)		S. Typhimurium		S. Typhimurium - in HeLa cells		C. jejuni		Intracellular C. jejuni - in HeLa cells		MRSA		MRSA		C. difficile spore (aerobic)				C. difficile spore (Anaerobic)
Experimental Replicates	Pre-treatment	CHCL3/MeOH	Pre-treatment	CHCL3/MeOH	Pre-treatment	CHCL3/MeOH	Pre-treatment	CHCL3/MeOH	Pre-treatment	CHCL3/MeOH	Pre-treatment	CHCL3/MeOH	Pre-treatment	CHCL3/MeOH	Pre-treatment	CHCL3/MeOH	Pre-treatment	CHCL3/MeOH	Pre-treatment	CHCL3/MeOH - 5min	CHCL3/MeOH - 20min	CHCL3/MeOH - 120 min	Pre-treatment (-O2)	CHCL3/MeOH (-O2)
replicate 1	63000000	0	65000000	0	900000000	0	200000000	0	4200000000	0	400000000	0	150000	0	650000000	0	3600000000	0	333333	3333.33	6666.67	6666.67	100000	0
replicate 2	63000000	0	105000000	0	300000000	0	800000000	0	1700000000	0	800000000	0	80000	0	240000000	0	1340000000	0	66666.7	333.333	666.667	1000	666667	66.6667
replicate 3	63000000	0	30000000	0	300000000	0	500000000	0	1860000000	0	300000000	0	120000	0	400000000	0	1230000000	0	333333	3333.33	10000	10000	76666.7	0
replicate 4	63000000	0	20000000	0	300000000	0	200000000	0	2040000000	0	400000000	0	120000	0	400000000	0	1030000000	0	100000	333.333	13333.3	3333.33	66666.7	100
replicate 5	63000000	0	40000000	0	120000000	0	200000000	0	2270000000	0	200000000	0	150000	0	1200000000	0	1200000000	0	100000	166.667	666.667	2000	333333	100
replicate 6	63000000	0	55000000	0	300000000	0	300000000	0	2180000000	0	300000000	0	60000	0	1000000000	0	1110000000	0	66666.7	16666.7	3333.33	2000	200000	133.333
replicate 7	63000000	0	40000000	0	100000000	0	200000000	0	1630000000	0	500000000	0	100000	0	800000000	0	3000000000	10	33333.3	3333.33	3333.33	6666.67	133333	0
replicate 8	63000000	0	75000000	0	300000000	0	210000000	0	3100000000	0	300000000	0	80000	0	100000000	0	2080000000	0	33333.3	33333.3	3000	10000	333333	1666.67
replicate 9	63000000	0	95000000	0	100000000	0	100000000	0	2900000000	0	300000000	0	50000	0	600000000	0	1200000000	0	3.33333e+07	10000	10000	13333.3	100000	0
replicate 10	63000000	0	85000000	0	100000000	0	200000000	0	1820000000	0	500000000	0	120000	0	310000000	0	1290000000	0	333333	233333	100000	66666.7	333333	0
replicate 11	63000000	0	80000000	0	300000000	0	300000000	0	1470000000	0	700000000	0	100000	0	240000000	0	1340000000	0	333333	2000	1000	1000	33333.3	66.6667
replicate 12	63000000	0	20000000	0	200000000	0	300000000	0	1560000000	0	300000000	0	160000	0	100000000	0	1610000000	0	133333	6666.67	6666.67	10000	333333	333.333
replicate 13	63000000	0	65000000	0	400000000	0	170000000	0	1490000000	0	100000000	0	100000	0	600000000	0	1400000000	10	133333	3333.33	16666.7	10000	666667	33.3333
replicate 14	63000000	0	55000000	0	100000000	0	100000000	0	1770000000	0	800000000	0	90000	0	300000000	0	3500000000	0	666667	333333	66666.7	33333.3	66666.7	0
replicate 15	63000000	0	30000000	0	100000000	0	400000000	0	1500000000	0	600000000	0	80000	0	100000000	0	820000000	0	3.33333e+07	66666.7	100000	6666.67	66666.7	100
replicate 16	63000000	0	50000000	0	100000000	0	600000000	0	1580000000	0	900000000	0	170000	0	100000000	0	2000000000	0	3.33333e+06	100000	13333.3	266.667	66666.7	333.333
replicate 17	63000000	0	65000000	0	100000000	0	200000000	0	2340000000	0	200000000	0	120000	0	200000000	0	4400000000	0	333333	3333.33	13333.3	6666.67	133333	300
replicate 18	63000000	0	60000000	0	500000000	0	270000000	0	1550000000	0	400000000	0	160000	0	200000000	0	1500000000	0	66666.7	3333.33	1000	13333.3	33333.3	133.333
replicate 19	63000000	0	45000000	0	300000000	0	700000000	0	1900000000	0	2000000000	0	100000	0	1500000000	0	1400000000	0	1000000	33333.3	66666.7	100000	33333.3	333.333
replicate 20	63000000	0	25000000	0	400000000	0	500000000	0	1810000000	0	500000000	0	60000	0	700000000	0	3000000000	0	333333	33333.3	100000	16666.7	66666.7	333.333
	Yersinia pestis		Yersinia pestis-macrophage infection		Y. enterocolitica		S. Typhimurium		S. Typhimurium-Hela cell infection		C. jejuni		Intracellular C. jejuni - HeLa cell infection		MRSA		MRSA		C. difficile spore (aerobic)				C. difficile spore (Anaerobic)
	Pre-treatment	CHCL3/MeOH	Pre-treatment	CHCL3/MeOH	Pre-treatment	CHCL3/MeOH	Pre-treatment	CHCL3/MeOH	Pre-treatment	CHCL3/MeOH	Pre-treatment	CHCL3/MeOH	Pre-treatment	CHCL3/MeOH	Pre-treatment	CHCL3/MeOH	Pre-treatment	CHCL3/MeOH	Pre-treatment	CHCL3/MeOH - 5min	CHCL3/MeOH - 20min	CHCL3/MeOH - 120 min	Pre-treatment (-O2)	CHCL3/MeOH (-O2)
Average	63000000	0	55250000	0	266000000	0	322500000	0	2033500000	0	525000000	0	108500	0	487000000	0	1902500000	1	3720000	44475	26816.7	15980	192167	201.667
Std. Dev.	0	0	2.46275e+07	0	1.94568e+08	0	1.98119e+08	0	6.80613e+08	0	4.10231e+08	0	35729.2	0	3.9473e+08	0	1.02295e+09	3.07794	1.01534e+07	87137.5	36735.4	24794.6	194904	368.095
Std. error	0	0	5.50687e+06	0	4.35068e+07	0	4.43009e+07	0	1.5219e+08	0	9.17304e+07	0	7989.3	0	8.82643e+07	0	2.28738e+08	0.688247	2.27037e+06	19484.5	8214.29	5544.23	43581.8	82.3086
Max	63000000	0	105000000	0	900000000	0	800000000	0	4200000000	0	2000000000	0	170000	0	1500000000	0	4400000000	10	3.33333e+07	333333	100000	100000	666667	1666.67
Min	63000000	0	20000000	0	100000000	0	100000000	0	1470000000	0	100000000	0	50000	0	100000000	0	820000000	0	33333.3	166.667	666.667	266.667	33333.3	0
		Percent Reduction		Percent Reduction		Percent Reduction		Percent Reduction		Percent Reduction		Percent Reduction		Percent Reduction		Percent Reduction		Percent Reduction		Percent Reduction	Percent Reduction	Percent Reduction		Percent Reduction
		1		1		1		1		1		1		1		1		100		98.8044	99.2791	99.5704		99.8951

## Sheet: Viruses
Table S1. MPLEx Inactivation of Viral Pathogens
(value included in manuscript)	Cerebral cortex neuron (CN) West Nile Virus infection		Dendritic cell (DC) West Nile Virus Infection		Granule cell layer neurons (GCN) West Nile Virus infection		Calu-3 2B4 cells / MERS infection		IHH cells Ebola infection		Calu-3 cells / Influenza H7N9 infection		Mouse Lung / Influenza H7N9 infection
Experimental Replicates	Pre-treatment	CHCL3/MeOH^	Pre-treatment	CHCL3/MeOH^	Pre-treatment	CHCL3/MeOH^	Pre-treatment	CHCL3/MeOH*	Pre-treatment	CHCL3/MeOH (liquid phases; protein, lipid, and metabolite)	Pre-treatment	CHCL3/MeOH	Pre-treatment	CHCL3/MeOH
replicate 1	40000000	0	77000000	0	700000000	0	300000	0	2500000	0	256	0	128	0
replicate 2		0		0		0	500000	0		0		0		0
replicate 3		0		0		0	380000	0		0		0		0
replicate 4		0		0		0	600000	0		0		0		0
replicate 5		0		0		0	430000	0		0		0		0
replicate 6		0		0		0	300000	0		0		0		0
replicate 7		0		0		0	550000	0		0		0		0
replicate 8		0		0		0	2000000	0		0		0		0
replicate 9		0		0		0	1900000	0		0		0		0
replicate 10		0		0		0	1500000	0		0		0		0
replicate 11		0		0		0	250000	0		0		0		0
replicate 12		0		0		0	300000	0		0		0		0
replicate 13		0		0		0	1500000	0		0		0		0
replicate 14		0		0		0	150000	0		0		0		0
replicate 15		0		0		0	400000	0		0		0		0
replicate 16		0		0		0	500000	0		0		0		0
replicate 17		0		0		0	400000	0		0		0		0
replicate 18		0		0		0	350000	0		0		0		0
replicate 19		0		0		0	400000	0		0		0		0
replicate 20		0		0		0	420000	0		0		0		0
	Cerebral cortex neuron (CN) West Nile Virus infection		Dendritic cell (DC) West Nile Virus Infection		Granule cell layer neurons (GCN) West Nile Virus infection		MERS in Calu-3 2B4 cells		IHH cells Ebola infection		Influenza H7N9 in Calu-3 cells		Influenza H7N9 in Mouse Lung
	Pre-treatment	CHCL3/MeOH^	Pre-treatment	CHCL3/MeOH^	Pre-treatment	CHCL3/MeOH^	Pre-treatment	CHCL3/MeOH*	Pre-treatment	CHCL3/MeOH	Pre-treatment	CHCL3/MeOH	Pre-treatment	CHCL3/MeOH			Pre-treatment	CHCL3/MeOH
Average	40000000	0	77000000	0	700000000	0	656500	0	2500000	0	256	0	128	0		Ebola detection in Vero cells	2500000	0
Std. Dev.		0		0		0	567351	0		0		0		0
Std. error		0		0		0	126864	0		0		0		0
Max	40000000	0	77000000	0	700000000	0	2000000	0	2500000	0	256	0	128	0
Min	40000000	0	77000000	0	700000000	0	150000	0	2500000	0	256	0	128	0
	^Undetectable ≤ 100						*Undetectable ≤ 1

## Sheet: Adenovirus Type 5
Table S1. MPLEx Inactivation of Adenovirus Type 5
Sample	Infection	Replicate	MC Layer	Inoculation Titer	Plaque Count	Dilution	Plating Factor	Titer (PFU/ml)*	Percent Reduction
1	Adenovirus Type 5	1	lipid	n/a	0	0	10	0
2	Adenovirus Type 5	1	lipid	n/a	0	0	10	0
3	Adenovirus Type 5	1	lipid	n/a	0	0	10	0
4	Adenovirus Type 5	1	lipid	n/a	0	0	10	0
5	Adenovirus Type 5	1	metabolite	n/a	0	0	10	0
6	Adenovirus Type 5	1	metabolite	n/a	0	0	10	0
7	Adenovirus Type 5	1	metabolite	n/a	13	2	10	13000	99.987
8	Adenovirus Type 5	1	metabolite	n/a	0	0	10	0
9	Adenovirus Type 5	1	protein	n/a	0	0	10	0
10	Adenovirus Type 5	1	protein	n/a	15	3	10	150000	99.85
11	Adenovirus Type 5	1	protein	n/a	25	2	10	25000	99.975
12	Adenovirus Type 5	1	protein	n/a	39	2	10	39000	99.961
13	Adenovirus Type 5	2	lipid	n/a	0	0	10	0
14	Adenovirus Type 5	2	lipid	n/a	0	0	10	0
15	Adenovirus Type 5	2	lipid	n/a	0	0	10	0
16	Adenovirus Type 5	2	lipid	n/a	0	0	10	0
17	Adenovirus Type 5	2	metabolite	n/a	0	0	10	0
18	Adenovirus Type 5	2	metabolite	n/a	0	0	10	0
19	Adenovirus Type 5	2	metabolite	n/a	0	0	10	0
20	Adenovirus Type 5	2	metabolite	n/a	0	0	10	0
21	Adenovirus Type 5	2	protein	n/a	30	1	10	3000	99.997
22	Adenovirus Type 5	2	protein	n/a	0	0	10	0
23	Adenovirus Type 5	2	protein	n/a	0	0	10	0
24	Adenovirus Type 5	2	protein	n/a	0	0	10	0
25	Mock	1	lipid	n/a	0	0	10	0
26	Mock	1	metabolite	n/a	0	0	10	0
27	Mock	1	protein	n/a	0	0	10	0
28	Adenovirus Type 5	n/a	n/a	100 PFU	uncountable	5	10	>1 x 10^8
29	Adenovirus Type 5	n/a	n/a	1000 PFU	uncountable	5	10	>1 x 10^8
30	Adenovirus Type 5	n/a	n/a	10000 PFU	uncountable	5	10	>1 x 10^8
	*The limit of detection of the plaque assay is 10 PFU/ml
