# Supplementary material for: MPLEx: a method for simultaneous pathogen inactivation and extraction of samples for multi-omics profiling
Source: Royal Society of Chemistry journal article supplement (doi:10.1039/c6an02486f), 2017-01-01
Supplement: c6an02486f3.xlsx [file c6an02486f3.xlsx]

## Sheet: Sample Details
Table S2. Sample details for multi-omic measurements resulting from MPLEx extraction of influenza infected Calu-3 cells
Our Expt #	MassIVE dataset release (MassIVE Accession #)	Sample # (for each of the 3 PML analyses)	Sample type	Treated with	Time Points	biological replicates (infection/ mocks)
ICL102	MSV000079164	90	Calu-3 cells	A/Anhui/1/13 (AH1) A/Anhui/103F-106M (FM) Mockulum	0, 3, 7, 12, 18 & 24 h	5
Summary of the maximum coefficient of variation (CV) across each protein, metabolite, or lipid (either negative or positive ions) within a set of biological replicates.
	Minimum	Median	Maximum
Proteins	0.103	0.175	0.24
Metabolites	0.08	0.118	0.174
Lipids (negative ion)	0.073	0.125	0.218
Lipids (positive ion)	0.077	0.14	0.188
	average	0.1395
	stdev	0.0253837

## Sheet: Viral_Peptides
Table S2. Viral Peptide data for multi-omic measurements resulting from MPLEx extraction of influenza infected Calu-3 cells
			PVALUE (MOCK VS VIRUS)												FOLD CHANGE (MOCK / VIRUS)
PROTEIN	PEPTIDE	PEPTIDE.EX	FM 0hr	FM 3hr	FM 7hr	FM 12hr	FM 18hr	FM 24hr	AH1 0hr	AH1 3hr	AH1 7hr	AH1 12hr	AH1 18hr	AH1 24hr	FM 0hr	FM 3hr	FM 7hr	FM 12hr	FM 18hr	FM 24hr	AH1 0hr	AH1 3hr	AH1 7hr	AH1 12hr	AH1 18hr	AH1 24hr
Anhui_HA	SMGIQSGVQVDANCEGDCYHSGGTIISNLPFQNIDSR	K.SMGIQSGVQVDANCEGDCYHSGGTIISNLPFQNIDSR.A	1	1	1	0.000589913	0.00131216	0.000589913	1	1	1	0.00131216	0.000589913	0.000589913	NaN	NaN	NaN	NaN	NaN	NaN	NaN	NaN	NaN	NaN	NaN	NaN
Anhui_HA	WLLSNTDNAAFPQMTK	K.WLLSNTDNAAFPQMTK.S	1	1	0.0574696	0.000589913	0.00131216	0.000589913	1	1	0.000589913	0.00131216	0.000589913	0.000589913	NaN	NaN	NaN	NaN	NaN	NaN	NaN	NaN	NaN	NaN	NaN	NaN
Anhui_HA	QLRENAEEDGTGCFEIFHK	R.QLRENAEEDGTGCFEIFHK.C	1	1	1	0.000589913	0.00131216	0.000589913	1	1	1	0.00131216	0.000589913	0.000589913	NaN	NaN	NaN	NaN	NaN	NaN	NaN	NaN	NaN	NaN	NaN	NaN
Anhui_HA	LVTVGSSNYQQSFVPSPGARPQVNGLSGR	K.LVTVGSSNYQQSFVPSPGARPQVNGLSGR.I	1	1	1	0.000589913	0.00131216	0.000589913	1	1	0.010914	0.00131216	0.000589913	0.000589913	NaN	NaN	NaN	NaN	NaN	NaN	NaN	NaN	NaN	NaN	NaN	NaN
Anhui_HA	ESGGIDKEAMGFTYSGIR	R.ESGGIDKEAMGFTYSGIR.T	1	1	1	0.000589913	0.00131216	0.000589913	1	1	0.000589913	0.00131216	0.000589913	0.000589913	NaN	NaN	NaN	NaN	NaN	NaN	NaN	NaN	NaN	NaN	NaN	NaN
Anhui_HA	TNQQFELIDNEFNEVEK	K.TNQQFELIDNEFNEVEK.Q	1	1	1	0.000589913	0.00131216	0.000589913	1	1	0.000589913	0.00131216	0.000589913	0.000589913	NaN	NaN	NaN	NaN	NaN	NaN	NaN	NaN	NaN	NaN	NaN	NaN
Anhui_HA	EGSDVCYPGK	R.EGSDVCYPGK.F	1	1	1	0.000589913	0.00131216	0.000589913	1	1	0.000589913	0.00131216	0.000589913	0.000589913	NaN	NaN	NaN	NaN	NaN	NaN	NaN	NaN	NaN	NaN	NaN	NaN
Anhui_HA	ENAEEDGTGCFEIFHK	R.ENAEEDGTGCFEIFHK.C	1	1	1	0.000589913	0.00131216	0.000589913	1	1	1	0.00131216	0.000589913	0.000589913	NaN	NaN	NaN	NaN	NaN	NaN	NaN	NaN	NaN	NaN	NaN	NaN
Anhui_HA	SLLLATGMK	R.SLLLATGMK.N	1	1	1	0.000589913	0.00131216	0.000589913	1	1	0.663107	0.00131216	0.000589913	0.000589913	NaN	NaN	NaN	NaN	NaN	NaN	NaN	NaN	NaN	NaN	NaN	NaN
Anhui_HA	SGSSFYAEMK	R.SGSSFYAEMK.W	1	1	1	0.000589913	0.00131216	0.000589913	1	1	1	0.00131216	0.000589913	0.000589913	NaN	NaN	NaN	NaN	NaN	NaN	NaN	NaN	NaN	NaN	NaN	NaN
Anhui_HA	CDDDCMASIR	K.CDDDCMASIR.N	1	1	1	0.210652	0.00131216	0.000589913	1	1	1	0.0250255	0.000589913	0.000589913	NaN	NaN	NaN	NaN	NaN	NaN	NaN	NaN	NaN	NaN	NaN	NaN
Anhui_HA	FVNEEALR	K.FVNEEALR.Q	1	1	1	0.010914	0.00131216	0.000589913	1	1	1	0.00131216	0.000589913	0.000589913	NaN	NaN	NaN	NaN	NaN	NaN	NaN	NaN	NaN	NaN	NaN	NaN
Anhui_HA	HQNAQGEGTAADYK	R.HQNAQGEGTAADYK.S	1	1	1	0.000589913	0.00131216	0.000589913	1	1	0.010914	0.00131216	0.000589913	0.000589913	NaN	NaN	NaN	NaN	NaN	NaN	NaN	NaN	NaN	NaN	NaN	NaN
Anhui_HA	YREEAMQNR	K.YREEAMQNR.I	1	1	1	0.000589913	0.00131216	0.000589913	1	1	0.010914	0.00131216	0.000589913	0.000589913	NaN	NaN	NaN	NaN	NaN	NaN	NaN	NaN	NaN	NaN	NaN	NaN
Anhui_HA	STQSAIDQITGK	K.STQSAIDQITGK.L	1	1	1	0.000589913	0.00131216	0.000589913	1	1	0.000589913	0.00131216	0.000589913	0.000589913	NaN	NaN	NaN	NaN	NaN	NaN	NaN	NaN	NaN	NaN	NaN	NaN
Anhui_HA	NVPEIPK	K.NVPEIPK.G	1	1	1	0.210652	0.00131216	0.000589913	1	1	1	0.0250255	0.000589913	0.000589913	NaN	NaN	NaN	NaN	NaN	NaN	NaN	NaN	NaN	NaN	NaN	NaN
Anhui_M1	TRPILSPLTK	K.TRPILSPLTK.G	1	1	1	0.010914	0.00131216	0.000589913	1	1	1	0.00131216	0.000589913	0.000589913	NaN	NaN	NaN	NaN	NaN	NaN	NaN	NaN	NaN	NaN	NaN	NaN
Anhui_M1	LEDVFAGK	K.LEDVFAGK.N	1	1	1	0.0574696	0.00131216	0.000589913	1	1	1	0.00131216	0.000589913	0.000589913	NaN	NaN	NaN	NaN	NaN	NaN	NaN	NaN	NaN	NaN	NaN	NaN
Anhui_M1	GILGFVFTLTVPSER	K.GILGFVFTLTVPSER.G	1	1	0.210652	0.000589913	0.00131216	0.000589913	1	0.210652	0.000589913	0.00131216	0.000589913	0.000589913	NaN	NaN	NaN	NaN	NaN	NaN	NaN	NaN	NaN	NaN	NaN	NaN
Anhui_M1	EVALSYSTGALASCMGLIYNR	K.EVALSYSTGALASCMGLIYNR.M	1	1	1	0.210652	0.00131216	0.000589913	1	1	0.010914	0.546339	0.000589913	0.000589913	NaN	NaN	NaN	NaN	NaN	NaN	NaN	NaN	NaN	NaN	NaN	NaN
Anhui_M1	MVLASTTAK	R.M*VLASTTAK.A	1	1	1	0.210652	0.0250255	0.000589913	1	1	1	0.0250255	0.000589913	0.010914	NaN	NaN	NaN	NaN	NaN	NaN	NaN	NaN	NaN	NaN	NaN	NaN
Anhui_M1	MVLASTTAK	R.MVLASTTAK.A	1	1	1	0.000589913	0.00131216	0.000589913	1	1	0.000589913	0.00131216	0.000589913	0.000589913	NaN	NaN	NaN	NaN	NaN	NaN	NaN	NaN	NaN	NaN	NaN	NaN
Anhui_M1	QMVQAMR	R.QMVQAMR.A	1	1	1	0.0574696	0.00131216	0.000589913	1	1	1	0.00131216	0.000589913	0.000589913	NaN	NaN	NaN	NaN	NaN	NaN	NaN	NaN	NaN	NaN	NaN	NaN
Anhui_M1	AMEQMAGSSEQAAEAMEVASQAR	K.AMEQMAGSSEQAAEAMEVASQAR.Q	1	1	1	0.000589913	0.00131216	0.000589913	1	1	0.210652	0.00131216	0.000589913	0.000589913	NaN	NaN	NaN	NaN	NaN	NaN	NaN	NaN	NaN	NaN	NaN	NaN
Anhui_M1	QMATTTNPLIR	R.QMATTTNPLIR.H	1	1	1	0.000589913	0.00131216	0.000589913	1	1	0.663107	0.00131216	0.000589913	0.000589913	NaN	NaN	NaN	NaN	NaN	NaN	NaN	NaN	NaN	NaN	NaN	NaN
Anhui_M1	FVQNALNGNGDPNNMDK	R.FVQNALNGNGDPNNMDK.A	1	1	1	0.000589913	0.00131216	0.000589913	1	1	0.010914	0.00131216	0.000589913	0.000589913	NaN	NaN	NaN	NaN	NaN	NaN	NaN	NaN	NaN	NaN	NaN	NaN
Anhui_M1	TVGTHPNSSTGLKDDLIENLQAYQNR	R.TVGTHPNSSTGLKDDLIENLQAYQNR.M	1	1	0.000589913	0.000589913	0.00131216	0.000589913	1	0.663107	0.000589913	0.00131216	0.000589913	0.000589913	NaN	NaN	NaN	NaN	NaN	NaN	NaN	NaN	NaN	NaN	NaN	NaN
Anhui_M1	MGTVTAEGALGLVCATCEQIADAQHR	R.MGTVTAEGALGLVCATCEQIADAQHR.S	1	1	0.010914	0.000589913	0.00131216	0.000589913	1	0.0574696	0.010914	0.00131216	0.000589913	0.000589913	NaN	NaN	4.04515	NaN	NaN	NaN	NaN	NaN	14.687	NaN	NaN	NaN
Anhui_M1	MGTVTAEGALGLVCATCEQIADAQHR	R.M*GTVTAEGALGLVCATCEQIADAQHR.S	1	1	1	0.000589913	0.00131216	0.000589913	1	1	1	0.00131216	0.000589913	0.000589913	NaN	NaN	NaN	NaN	NaN	NaN	NaN	NaN	NaN	NaN	NaN	NaN
Anhui_M1	RFVQNALNGNGDPNNMDK	R.RFVQNALNGNGDPNNMDK.A	1	1	1	0.010914	0.00131216	0.000589913	1	1	1	0.00131216	0.000589913	0.000589913	NaN	NaN	NaN	NaN	NaN	NaN	NaN	NaN	NaN	NaN	NaN	NaN
Anhui_M1	NADLEALMEWIK	K.NADLEALMEWIK.T	1	1	1	0.000589913	0.00131216	0.000589913	1	1	0.000589913	0.00131216	0.000589913	0.000589913	NaN	NaN	NaN	NaN	NaN	NaN	NaN	NaN	NaN	NaN	NaN	NaN
Anhui_M1	EMTFHGAK	R.EMTFHGAK.E	1	1	1	0.010914	0.00131216	0.000589913	1	1	1	0.00131216	0.000589913	0.000589913	NaN	NaN	NaN	NaN	NaN	NaN	NaN	NaN	NaN	NaN	NaN	NaN
Anhui_M1	MGVQLQR	R.MGVQLQR.F	1	1	1	0.000589913	0.00131216	0.000589913	1	1	0.663107	0.00131216	0.000589913	0.000589913	NaN	NaN	NaN	NaN	NaN	NaN	NaN	NaN	NaN	NaN	NaN	NaN
Anhui_NA	IGESSDVLVTREPYVSCDPDECR	R.IGESSDVLVTREPYVSCDPDECR.F	1	1	1	0.000589913	0.00131216	0.000589913	1	1	1	0.00131216	0.000589913	0.000589913	NaN	NaN	NaN	NaN	NaN	NaN	NaN	NaN	NaN	NaN	NaN	NaN
Anhui_NA	GFSYLDGANTWLGR	K.GFSYLDGANTWLGR.T	1	1	1	0.000589913	0.00131216	0.000589913	1	1	1	0.00131216	0.000589913	0.000589913	NaN	NaN	NaN	NaN	NaN	NaN	NaN	NaN	NaN	NaN	NaN	NaN
Anhui_NA	EPYVSCDPDECR	R.EPYVSCDPDECR.F	1	1	1	0.000589913	0.00131216	0.000589913	1	1	1	0.00131216	0.000589913	0.000589913	NaN	NaN	NaN	NaN	NaN	NaN	NaN	NaN	NaN	NaN	NaN	NaN
Anhui_NA	TQESECVCHNGVCPVVFTDGSATGPADTR	R.TQESECVCHNGVCPVVFTDGSATGPADTR.I	1	1	1	0.000589913	0.00131216	0.000589913	1	1	1	0.137351	0.000589913	0.000589913	NaN	NaN	NaN	NaN	NaN	NaN	NaN	NaN	NaN	NaN	NaN	NaN
Anhui_NA	HIEECSCYGER	K.HIEECSCYGER.T	1	1	1	0.000589913	0.00131216	0.000589913	1	1	0.663107	0.00131216	0.000589913	0.000589913	NaN	NaN	NaN	NaN	NaN	NaN	NaN	NaN	NaN	NaN	NaN	NaN
Anhui_NA	RPVAEINTWAR	R.RPVAEINTWAR.N	1	1	1	0.000589913	0.00131216	0.000589913	1	1	1	0.00131216	0.000589913	0.000589913	NaN	NaN	NaN	NaN	NaN	NaN	NaN	NaN	NaN	NaN	NaN	NaN
Anhui_NA	SGYEMLKVPNALTDDR	R.SGYEMLKVPNALTDDR.S	1	1	1	0.000589913	0.00131216	0.000589913	1	1	1	0.00131216	0.000589913	0.000589913	NaN	NaN	NaN	NaN	NaN	NaN	NaN	NaN	NaN	NaN	NaN	NaN
Anhui_NA	FYALSQGTTIR	R.FYALSQGTTIR.G	1	1	1	0.000589913	0.00131216	0.000589913	1	1	0.0574696	0.00131216	0.000589913	0.000589913	NaN	NaN	NaN	NaN	NaN	NaN	NaN	NaN	NaN	NaN	NaN	NaN
Anhui_NA	ACFYVELIR	R.ACFYVELIR.G	1	1	1	0.000589913	0.00131216	0.000589913	1	1	1	0.00131216	0.000589913	0.000589913	NaN	NaN	NaN	NaN	NaN	NaN	NaN	NaN	NaN	NaN	NaN	NaN
Anhui_NA	TGITCTCR	R.TGITCTCR.D	1	1	1	0.000589913	0.00131216	0.000589913	1	1	1	0.00131216	0.000589913	0.000589913	NaN	NaN	NaN	NaN	NaN	NaN	NaN	NaN	NaN	NaN	NaN	NaN
Anhui_NA	ALISWPLSSPPTVYNSR	R.ALISWPLSSPPTVYNSR.V	1	1	1	0.000589913	0.00131216	0.000589913	1	1	0.000589913	0.00131216	0.000589913	0.000589913	NaN	NaN	NaN	NaN	NaN	NaN	NaN	NaN	NaN	NaN	NaN	NaN
Anhui_NA	ILKWESLTGTAK	K.ILKWESLTGTAK.H	1	1	1	0.000589913	0.00131216	0.000589913	1	1	1	0.00131216	0.000589913	0.000589913	NaN	NaN	NaN	NaN	NaN	NaN	NaN	NaN	NaN	NaN	NaN	NaN
Anhui_NA	CNDPYPGNNNNGVK	K.CNDPYPGNNNNGVK.G	1	1	1	0.000589913	0.00131216	0.000589913	1	1	1	0.00131216	0.000589913	0.000589913	NaN	NaN	NaN	NaN	NaN	NaN	NaN	NaN	NaN	NaN	NaN	NaN
Anhui_NA	VECIGWSSTSCHDGK	R.VECIGWSSTSCHDGK.S	1	1	1	0.000589913	0.00131216	0.000589913	1	1	1	0.00131216	0.000589913	0.000589913	NaN	NaN	NaN	NaN	NaN	NaN	NaN	NaN	NaN	NaN	NaN	NaN
Anhui_NA	GLCTINSWHIYGK	K.GLCTINSWHIYGK.D	1	1	1	0.000589913	0.00131216	0.000589913	1	1	1	0.00131216	0.000589913	0.000589913	NaN	NaN	NaN	NaN	NaN	NaN	NaN	NaN	NaN	NaN	NaN	NaN
Anhui_NP	GVQIASNENMEAMDSNTLELR	R.GVQIASNENMEAMDSNTLELR.S	1	1	1	0.000589913	0.00131216	0.010914	1	1	0.010914	0.0250255	0.0574696	0.010914	NaN	NaN	NaN	NaN	NaN	NaN	NaN	NaN	NaN	NaN	NaN	NaN
Anhui_NP	EGYSLVGIDPFR	R.EGYSLVGIDPFR.L	1	1	0.000589913	0.000589913	0.00131216	0.000589913	1	1	0.000589913	0.00131216	0.000589913	0.000589913	NaN	NaN	NaN	NaN	NaN	NaN	NaN	NaN	NaN	NaN	NaN	NaN
Anhui_NP	ATIMAAFTGNTEGR	R.ATIMAAFTGNTEGR.T	1	1	0.000589913	0.000589913	0.00131216	0.000589913	1	1	0.000589913	0.00131216	0.000589913	0.000589913	NaN	NaN	NaN	NaN	NaN	NaN	NaN	NaN	NaN	NaN	NaN	NaN
Anhui_NP	SYEQMETGGER	R.SYEQMETGGER.Q	1	1	0.210652	0.000589913	0.00131216	0.000589913	1	1	0.210652	0.00131216	0.000589913	0.000589913	NaN	NaN	NaN	NaN	NaN	NaN	NaN	NaN	NaN	NaN	NaN	NaN
Anhui_NP	NPGNAEIEDLIFLAR	R.NPGNAEIEDLIFLAR.S	1	1	0.000589913	0.000589913	0.00131216	0.000589913	1	0.663107	0.000589913	0.00131216	0.000589913	0.000589913	NaN	NaN	NaN	NaN	NaN	NaN	NaN	NaN	NaN	NaN	NaN	NaN
Anhui_NP	LIQNSITIER	R.LIQNSITIER.M	1	1	0.000589913	0.000589913	0.00131216	0.000589913	1	1	0.000589913	0.00131216	0.000589913	0.000589913	NaN	NaN	NaN	NaN	NaN	NaN	NaN	NaN	NaN	NaN	NaN	NaN
Anhui_NP	ESRNPGNAEIEDLIFLAR	R.ESRNPGNAEIEDLIFLAR.S	1	1	1	0.000589913	0.00131216	0.000589913	1	1	0.010914	0.00131216	0.000589913	0.000589913	NaN	NaN	NaN	NaN	NaN	NaN	NaN	NaN	NaN	NaN	NaN	NaN
Anhui_NP	MMESARPEDVSFQGR	R.MMESARPEDVSFQGR.G	1	1	0.000589913	0.000589913	0.00131216	0.000589913	1	1	0.000589913	0.00131216	0.000589913	0.000589913	NaN	NaN	NaN	NaN	NaN	NaN	NaN	NaN	NaN	NaN	NaN	NaN
Anhui_NP	MVLSAFDERR	R.MVLSAFDERR.N	1	1	1	0.000589913	0.00131216	0.000589913	1	1	0.000589913	0.00131216	0.000589913	0.000589913	NaN	NaN	NaN	NaN	NaN	NaN	NaN	NaN	NaN	NaN	NaN	NaN
Anhui_NP	LLQNSQVFSLIRPNENPAHK	R.LLQNSQVFSLIRPNENPAHK.S	1	1	1	0.000589913	0.00131216	0.000589913	1	1	0.000589913	0.00131216	0.000589913	0.010914	NaN	NaN	NaN	NaN	NaN	NaN	NaN	NaN	NaN	NaN	NaN	NaN
Anhui_NP	YLEEHPSAGKDPK	K.YLEEHPSAGKDPK.K	1	1	0.000589913	0.000589913	0.00131216	0.000589913	1	1	0.000589913	0.00131216	0.000589913	0.000589913	NaN	NaN	NaN	NaN	NaN	NaN	NaN	NaN	NaN	NaN	NaN	NaN
Anhui_NP	GKFQTAAQR	K.GKFQTAAQR.A	1	1	0.010914	0.000589913	0.00131216	0.000589913	1	1	0.000589913	0.00131216	0.000589913	0.000589913	NaN	NaN	NaN	NaN	NaN	NaN	NaN	NaN	NaN	NaN	NaN	NaN
Anhui_NP	KTGGPIYR	K.KTGGPIYR.R	0.663107	1	1	0.0574696	0.00131216	0.000589913	1	1	0.0574696	0.00131216	0.000589913	0.000589913	NaN	NaN	NaN	NaN	NaN	NaN	NaN	NaN	NaN	NaN	NaN	NaN
Anhui_NP	FQTAAQR	K.FQTAAQR.A	1	1	1	0.000589913	0.00131216	0.000589913	1	1	0.663107	0.00131216	0.000589913	0.000589913	NaN	NaN	NaN	NaN	NaN	NaN	NaN	NaN	NaN	NaN	NaN	NaN
Anhui_NP	QANNGEDATAGLTHLMIWHSNLNDATYQR	R.QANNGEDATAGLTHLMIWHSNLNDATYQR.T	1	1	0.663107	0.000589913	0.00131216	0.000589913	1	1	0.000589913	0.0250255	0.000589913	0.000589913	NaN	NaN	NaN	NaN	NaN	NaN	NaN	NaN	NaN	NaN	NaN	NaN
Anhui_NP	SCLPACVYGLAVASGYDFER	K.SCLPACVYGLAVASGYDFER.E	1	1	0.663107	0.000589913	0.00131216	0.000589913	1	1	0.000589913	0.00131216	0.000589913	0.000589913	NaN	NaN	NaN	NaN	NaN	NaN	NaN	NaN	NaN	NaN	NaN	NaN
Anhui_NP	SQLVWMACHSAAFEDLR	K.SQLVWMACHSAAFEDLR.V	1	1	1	0.000589913	0.00131216	0.000589913	1	1	0.000589913	0.00131216	0.000589913	0.000589913	NaN	NaN	NaN	NaN	NaN	NaN	NaN	NaN	NaN	NaN	NaN	NaN
Anhui_NP	MCSLMQGSTLPR	R.MCSLMQGSTLPR.R	1	1	0.663107	0.000589913	0.00131216	0.000589913	1	1	0.010914	0.00131216	0.000589913	0.000589913	NaN	NaN	NaN	NaN	NaN	NaN	NaN	NaN	NaN	NaN	NaN	NaN
Anhui_NP	MVLSAFDER	R.MVLSAFDER.R	1	1	1	0.000589913	0.00131216	0.000589913	1	1	0.000589913	0.00131216	0.000589913	0.000589913	NaN	NaN	NaN	NaN	NaN	NaN	NaN	NaN	NaN	NaN	NaN	NaN
Anhui_NP	FYIQMCTELK	R.FYIQMCTELK.L	1	1	0.663107	0.000589913	0.00131216	0.000589913	1	1	0.000589913	0.00131216	0.000589913	0.000589913	NaN	NaN	NaN	NaN	NaN	NaN	NaN	NaN	NaN	NaN	NaN	NaN
Anhui_NP	SYEQMETGGER	R.SYEQM*ETGGER.Q	1	1	1	0.210652	0.00131216	0.000589913	1	1	1	0.00131216	0.000589913	0.000589913	NaN	NaN	NaN	NaN	NaN	NaN	NaN	NaN	NaN	NaN	NaN	NaN
Anhui_NP	GVFELSDEK	R.GVFELSDEK.A	1	1	1	0.000589913	0.00131216	0.000589913	1	1	0.000589913	0.00131216	0.000589913	0.000589913	NaN	NaN	NaN	NaN	NaN	NaN	NaN	NaN	NaN	NaN	NaN	NaN
Anhui_NP	RSYEQMETGGER	K.RSYEQMETGGER.Q	1	1	1	1	0.00131216	0.000589913	1	1	1	0.00131216	0.000589913	0.000589913	NaN	NaN	NaN	NaN	NaN	NaN	NaN	NaN	NaN	NaN	NaN	NaN
Anhui_NP	ELILYDKEEIRR	R.ELILYDKEEIRR.I	1	1	1	0.0574696	0.137351	0.000589913	1	1	0.0574696	0.0250255	0.000589913	0.010914	NaN	NaN	NaN	NaN	NaN	NaN	NaN	NaN	NaN	NaN	NaN	NaN
Anhui_NP	AMMDQVR	R.AMMDQVR.E	1	1	1	0.000589913	0.00131216	0.000589913	1	1	0.210652	0.00131216	0.000589913	0.000589913	NaN	NaN	NaN	NaN	NaN	NaN	NaN	NaN	NaN	NaN	NaN	NaN
Anhui_NP	ELILYDKEEIR	R.ELILYDKEEIR.R	1	1	1	0.000589913	0.00131216	0.000589913	1	1	0.000589913	0.00131216	0.000589913	0.000589913	NaN	NaN	NaN	NaN	NaN	NaN	NaN	NaN	NaN	NaN	NaN	NaN
Anhui_NP	ASAGQVSVQPTFSVQR	R.ASAGQVSVQPTFSVQR.N	1	1	0.000589913	0.000589913	0.00131216	0.000589913	1	1	0.000589913	0.00131216	0.000589913	0.000589913	NaN	NaN	NaN	NaN	NaN	NaN	NaN	NaN	NaN	NaN	NaN	NaN
Anhui_NP	GIGTMVMELIR	K.GIGTMVMELIR.M	1	1	0.010914	0.000589913	0.00131216	0.000589913	1	0.210652	0.010914	0.00131216	0.000589913	0.000589913	NaN	NaN	5.07188	NaN	NaN	NaN	NaN	NaN	31.6942	NaN	NaN	NaN
Anhui_NS1	VSETLQR	R.VSETLQR.F	1	1	0.663107	0.000589913	0.00131216	0.000589913	1	1	0.010914	0.00131216	0.000589913	0.000589913	NaN	NaN	NaN	NaN	NaN	NaN	NaN	NaN	NaN	NaN	NaN	NaN
Anhui_NS1	YLTDMTLEEMSR	R.YLTDMTLEEMSR.D	1	1	0.210652	0.000589913	0.00131216	0.000589913	1	1	0.000589913	0.00131216	0.000589913	0.000589913	NaN	NaN	NaN	NaN	NaN	NaN	NaN	NaN	NaN	NaN	NaN	NaN
Anhui_NS1	ILEEESDEAFKMSIASVPAPR	R.ILEEESDEAFKMSIASVPAPR.Y	1	1	1	0.0574696	0.00131216	0.000589913	1	1	0.663107	0.00131216	0.000589913	0.000589913	NaN	NaN	NaN	NaN	NaN	NaN	NaN	NaN	NaN	NaN	NaN	NaN
Anhui_NS1	FADQEMGDAPFLDR	R.FADQEMGDAPFLDR.L	1	1	0.000589913	0.000589913	0.00131216	0.000589913	1	0.663107	0.000589913	0.00131216	0.000589913	0.000589913	NaN	NaN	NaN	NaN	NaN	NaN	NaN	NaN	NaN	NaN	NaN	NaN
Anhui_NS1	ILEEESDEAFK	R.ILEEESDEAFK.M	1	1	0.010914	0.000589913	0.00131216	0.000589913	1	1	0.010914	0.00131216	0.000589913	0.000589913	NaN	NaN	6.15935	NaN	NaN	NaN	NaN	NaN	33.2464	NaN	NaN	NaN
Anhui_NS1	FADQEMGDAPFLDRLR	R.FADQEMGDAPFLDRLR.R	0.663107	1	1	0.010914	0.00131216	0.000589913	1	1	0.0574696	0.00131216	0.000589913	0.000589913	NaN	NaN	NaN	NaN	NaN	NaN	NaN	NaN	NaN	NaN	NaN	NaN
Anhui_NS1	MSIASVPAPR	K.MSIASVPAPR.Y	1	1	0.010914	0.000589913	0.00131216	0.000589913	1	1	0.000589913	0.00131216	0.000589913	0.000589913	NaN	NaN	NaN	NaN	NaN	NaN	NaN	NaN	NaN	NaN	NaN	NaN
Anhui_NS1	MDQAIVDKNITLK	R.MDQAIVDKNITLK.A	1	1	0.663107	0.000589913	0.00131216	0.000589913	1	1	0.000589913	0.00131216	0.000589913	0.000589913	NaN	NaN	NaN	NaN	NaN	NaN	NaN	NaN	NaN	NaN	NaN	NaN
Anhui_NS1	FNRLEALILLR	I.FNRLEALILLR.A	1	1	1	1	0.00131216	0.000589913	1	1	1	0.0250255	0.000589913	0.010914	NaN	NaN	NaN	NaN	NaN	NaN	NaN	NaN	NaN	NaN	NaN	NaN
Anhui_NS1	SSTLGLDIR	R.SSTLGLDIR.T	1	1	0.663107	0.000589913	0.00131216	0.000589913	1	1	0.000589913	0.00131216	0.000589913	0.000589913	NaN	NaN	NaN	NaN	NaN	NaN	NaN	NaN	NaN	NaN	NaN	NaN
Anhui_NS1	QKITGSLCIR	K.QKITGSLCIR.M	1	1	1	0.010914	0.00131216	0.000589913	1	1	0.663107	0.00131216	0.000589913	0.000589913	NaN	NaN	NaN	NaN	NaN	NaN	NaN	NaN	NaN	NaN	NaN	NaN
Anhui_NS1	SSDEDGRSPLSTK	R.SSDEDGRSPLSTK.-	1	1	0.010914	0.000589913	0.00131216	0.000589913	1	1	0.000589913	0.00131216	0.000589913	0.000589913	NaN	NaN	NaN	NaN	NaN	NaN	NaN	NaN	NaN	NaN	NaN	NaN
Anhui_NS1	ITGSLCIR	K.ITGSLCIR.M	1	1	1	0.000589913	0.00131216	0.010914	1	1	0.000589913	0.00131216	0.000589913	0.010914	NaN	NaN	NaN	NaN	NaN	93.9547	NaN	NaN	NaN	NaN	NaN	77.2902
Anhui_NS1	LEALILLR	R.LEALILLR.A	1	1	1	0.000589913	0.00131216	0.000589913	1	1	0.010914	0.00131216	0.000589913	0.000589913	NaN	NaN	NaN	NaN	NaN	NaN	NaN	NaN	NaN	NaN	NaN	NaN
Anhui_NS1	MDQAIVDK	R.MDQAIVDK.N	1	1	1	0.000589913	0.00131216	0.000589913	1	1	0.0574696	0.00131216	0.000589913	0.000589913	NaN	NaN	NaN	NaN	NaN	NaN	NaN	NaN	NaN	NaN	NaN	NaN
Anhui_NS1	ANFSVIFNR	K.ANFSVIFNR.L	1	1	1	0.000589913	0.0250255	0.000589913	1	1	0.663107	0.0250255	0.000589913	0.000589913	NaN	NaN	NaN	NaN	NaN	NaN	NaN	NaN	NaN	NaN	NaN	NaN
Anhui_NS1	ANFSVIFNRLEAL	K.ANFSVIFNRLEAL.I	1	1	1	0.663107	0.00131216	0.000589913	1	1	1	0.00131216	0.000589913	0.000589913	NaN	NaN	NaN	NaN	NaN	NaN	NaN	NaN	NaN	NaN	NaN	NaN
Anhui_NS1	FADQEMGDAPFLDR	R.FADQEM*GDAPFLDR.L	1	1	1	0.210652	0.00131216	0.000589913	1	1	1	0.00131216	0.000589913	0.000589913	NaN	NaN	NaN	NaN	NaN	NaN	NaN	NaN	NaN	NaN	NaN	NaN
Anhui_NS2	SSSEDLNGMITQFESLK	R.SSSEDLNGMITQFESLK.L	1	1	1	0.010914	0.00131216	0.000589913	1	1	0.210652	0.00131216	0.000589913	0.000589913	NaN	NaN	NaN	NaN	NaN	NaN	NaN	NaN	NaN	NaN	NaN	NaN
Anhui_NS2	MGDLHSLQSR	R.MGDLHSLQSR.N	1	1	1	0.010914	0.00131216	0.000589913	1	1	1	0.00131216	0.000589913	0.000589913	NaN	NaN	NaN	NaN	NaN	NaN	NaN	NaN	NaN	NaN	NaN	NaN
Anhui_PA	FLLMDALK	K.FLLMDALK.L	1	1	1	0.663107	0.00131216	0.000589913	1	1	1	0.0250255	0.000589913	0.000589913	NaN	NaN	NaN	NaN	NaN	NaN	NaN	NaN	NaN	NaN	NaN	NaN
Anhui_PA	YCVLEIGDMLLR	K.YCVLEIGDMLLR.S	1	1	1	0.000589913	0.00131216	0.000589913	1	1	0.010914	0.00131216	0.000589913	0.000589913	NaN	NaN	NaN	NaN	NaN	NaN	NaN	NaN	NaN	NaN	NaN	NaN
Anhui_PA	AYVDGFEPNGCIEGK	R.AYVDGFEPNGCIEGK.L	1	1	1	0.010914	0.00131216	0.000589913	1	1	1	0.00131216	0.000589913	0.000589913	NaN	NaN	NaN	NaN	NaN	NaN	NaN	NaN	NaN	NaN	NaN	NaN
Anhui_PA	GVYINTALLNASCAAMDDFQLIPMISK	K.GVYINTALLNASCAAMDDFQLIPMISK.C	1	1	1	0.0574696	0.0250255	0.000589913	1	1	1	0.00131216	0.010914	0.000589913	NaN	NaN	NaN	NaN	NaN	NaN	NaN	NaN	NaN	NaN	NaN	NaN
Anhui_PA	LSIEDPSHEGEGIPLYDAIK	K.LSIEDPSHEGEGIPLYDAIK.C	1	1	1	0.210652	0.00131216	0.000589913	1	1	1	0.00131216	0.000589913	0.000589913	NaN	NaN	NaN	NaN	NaN	NaN	NaN	NaN	NaN	NaN	NaN	NaN
Anhui_PA	CLLQSLQQIESMIEAESSVK	R.CLLQSLQQIESMIEAESSVK.E	1	1	1	0.010914	0.00131216	0.000589913	1	1	0.663107	0.00131216	0.000589913	0.000589913	NaN	NaN	NaN	NaN	NaN	NaN	NaN	NaN	NaN	NaN	NaN	NaN
Anhui_PA	TAVGQVSRPMFLYVR	R.TAVGQVSRPMFLYVR.T	1	1	1	1	0.00131216	0.000589913	1	1	1	0.0250255	0.000589913	0.000589913	NaN	NaN	NaN	NaN	NaN	NaN	NaN	NaN	NaN	NaN	NaN	NaN
Anhui_PA	QVLAELQDIENEEKIPR	K.QVLAELQDIENEEKIPR.T	1	1	0.663107	0.010914	0.019993	0.000589913	0.546339	0.663107	1	0.00131216	0.010914	0.000589913	NaN	NaN	NaN	NaN	3.05507	NaN	NaN	NaN	-1.85453	NaN	3.08018	NaN
Anhui_PA	WALGENMAPEKVDFEDCKDVNDLK	K.WALGENMAPEKVDFEDCKDVNDLK.Q	1	1	1	0.0574696	0.00131216	0.000589913	1	1	1	0.00131216	0.000589913	0.000589913	NaN	NaN	NaN	NaN	NaN	NaN	NaN	NaN	NaN	NaN	NaN	NaN
Anhui_PA	GINPNYLLTWK	K.GINPNYLLTWK.Q	1	1	1	1	0.00131216	0.000589913	1	1	1	0.0250255	0.000589913	0.000589913	NaN	NaN	NaN	NaN	NaN	NaN	NaN	NaN	NaN	NaN	NaN	NaN
Anhui_PB1	NQPAATALANTIEVFR	R.NQPAATALANTIEVFR.S	1	1	1	0.210652	0.00131216	0.000589913	1	1	1	0.00131216	0.000589913	0.000589913	NaN	NaN	NaN	NaN	NaN	NaN	NaN	NaN	NaN	NaN	NaN	NaN
Anhui_PB1	GILEDEQMYQK	R.GILEDEQMYQK.C	1	1	1	0.663107	0.00131216	0.000589913	1	1	1	0.00131216	0.000589913	0.000589913	NaN	NaN	NaN	NaN	NaN	NaN	NaN	NaN	NaN	NaN	NaN	NaN
Anhui_PB1	AGLLVSDGGPNLYNIR	K.AGLLVSDGGPNLYNIR.N	1	1	1	0.663107	0.00131216	0.000589913	1	1	0.663107	0.00131216	0.010914	0.000589913	NaN	NaN	NaN	NaN	NaN	NaN	NaN	NaN	NaN	NaN	NaN	NaN
Anhui_PB1	RPVGISSMVEAMVSR	R.RPVGISSMVEAMVSR.A	1	1	1	1	0.00131216	0.000589913	1	1	1	0.00131216	0.000589913	0.000589913	NaN	NaN	NaN	NaN	NaN	NaN	NaN	NaN	NaN	NaN	NaN	NaN
Anhui_PB1	SKAGLLVSDGGPNLYNIR	R.SKAGLLVSDGGPNLYNIR.N	1	1	1	0.663107	0.00131216	0.000589913	1	1	1	0.00131216	0.000589913	0.000589913	NaN	NaN	NaN	NaN	NaN	NaN	NaN	NaN	NaN	NaN	NaN	NaN
Anhui_PB1	LIDFLKDVMDSMDKEEMEITTHFQR	R.LIDFLKDVMDSMDKEEMEITTHFQR.K	1	1	1	0.000589913	0.00131216	0.000589913	1	1	0.0574696	0.00131216	0.000589913	0.000589913	NaN	NaN	NaN	NaN	NaN	NaN	NaN	NaN	NaN	NaN	NaN	NaN
Anhui_PB1	GFVYFVEALAR	R.GFVYFVEALAR.S	1	1	1	0.000589913	0.00131216	0.000589913	1	1	0.663107	0.00131216	0.000589913	0.000589913	NaN	NaN	NaN	NaN	NaN	NaN	NaN	NaN	NaN	NaN	NaN	NaN
Anhui_PB1	TQVPAEMLANIDLK	R.TQVPAEMLANIDLK.Y	1	1	1	0.663107	0.00131216	0.000589913	1	1	1	0.00131216	0.000589913	0.000589913	NaN	NaN	NaN	NaN	NaN	NaN	NaN	NaN	NaN	NaN	NaN	NaN
Anhui_PB1	ICSTIEELRR	K.ICSTIEELRR.Q	1	1	1	0.663107	0.00131216	0.000589913	1	1	1	0.00131216	0.000589913	0.000589913	NaN	NaN	NaN	NaN	NaN	NaN	NaN	NaN	NaN	NaN	NaN	NaN
Anhui_PB2	YGPALSINELSNLAK	R.YGPALSINELSNLAK.G	1	1	1	1	0.00131216	0.010914	1	1	1	0.546339	0.010914	0.000589913	NaN	NaN	NaN	NaN	NaN	NaN	NaN	NaN	NaN	NaN	NaN	NaN
Anhui_PB2	DSSILTDSQTATKR	R.DSSILTDSQTATKR.I	1	1	1	1	0.00131216	0.000589913	1	1	1	0.0250255	0.000589913	0.000589913	NaN	NaN	NaN	NaN	NaN	NaN	NaN	NaN	NaN	NaN	NaN	NaN
Anhui_PB2	ILTSESQLTITK	R.ILTSESQLTITK.E	1	1	1	0.010914	0.00131216	0.000589913	1	1	1	0.00131216	0.000589913	0.000589913	NaN	NaN	NaN	NaN	NaN	NaN	NaN	NaN	NaN	NaN	NaN	NaN
Anhui_PB2	VMVSPLAVTWWNR	R.VMVSPLAVTWWNR.N	1	1	1	0.010914	0.00131216	0.000589913	1	1	1	0.00131216	0.000589913	0.000589913	NaN	NaN	NaN	NaN	NaN	NaN	NaN	NaN	NaN	NaN	NaN	NaN
Anhui_PB2	NDDVDQSLIIAAR	R.NDDVDQSLIIAAR.N	1	1	1	1	0.00131216	0.000589913	1	1	1	0.00131216	0.000589913	0.000589913	NaN	NaN	NaN	NaN	NaN	NaN	NaN	NaN	NaN	NaN	NaN	NaN
Anhui_PB2	RVDINPGHADLSAK	R.RVDINPGHADLSAK.E	1	1	1	0.010914	0.00131216	0.000589913	1	1	1	0.00131216	0.000589913	0.000589913	NaN	NaN	NaN	NaN	NaN	NaN	NaN	NaN	NaN	NaN	NaN	NaN
Anhui_PB2	NGPTTSTVHYPK	R.NGPTTSTVHYPK.V	1	1	1	0.663107	0.00131216	0.000589913	1	1	1	0.0250255	0.000589913	0.000589913	NaN	NaN	NaN	NaN	NaN	NaN	NaN	NaN	NaN	NaN	NaN	NaN
Anhui_PB2	ATVSADPLASLLEMCHSTQIGGVR	R.ATVSADPLASLLEMCHSTQIGGVR.M	1	1	1	0.010914	0.00131216	0.000589913	1	1	1	0.0250255	0.000589913	0.000589913	NaN	NaN	NaN	NaN	NaN	NaN	NaN	NaN	NaN	NaN	NaN	NaN

## Sheet: Ribosomal_Proteins
Table S2. Ribosomal protein data for multi-omic measurements resulting from MPLEx extraction of influenza infected Calu-3 cells
			PVALUE (MOCK VS VIRUS)												FOLD CHANGE (MOCK / VIRUS)
Protein	Subunit	#Peptides	FM_0h_Pval	FM_3h_Pval	FM_7h_Pval	FM_12h_Pval	FM_18h_Pval	FM_24h_Pval	AH1_0h_Pval	AH1_3h_Pval	AH1_7h_Pval	AH1_12h_Pval	AH1_18h_Pval	AH1_24h_Pval	FM_0h_log2FC	FM_3h_log2FC	FM_7h_log2FC	FM_12h_log2FC	FM_18h_log2FC	FM_24h_log2FC	AH1_0h_log2FC	AH1_3h_log2FC	AH1_7h_log2FC	AH1_12h_log2FC	AH1_18h_log2FC	AH1_24h_log2FC
RS11_HUMAN	40S	11	0.968	0.597	0.606	0.772	0.251	0.073	0.928	0.914	0.789	0.243	0.062	0.017	0.0362768	-0.0949409	0.0953408	0.0577289	0.138121	0.194164	0.0519495	-0.0470975	0.0697311	0.132903	0.191432	0.252533
RS12_HUMAN	40S	9	0.835	0.994	1	0.984	0.206	0.727	0.437	1	0.454	0.603	0.137	0.921	0.041199	-0.0174353	0.00333764	0.0260469	0.185552	0.068238	-0.0838739	0.00202149	0.0949619	0.101027	0.198162	0.0402354
RS13_HUMAN	40S	10	0.849	0.963	0.521	0.65	0.039	0.096	0.879	1	0.159	0.993	0.036	0.3	0.0769795	-0.0354615	0.11122	-0.127374	0.241352	0.222774	-0.0744906	0.0063731	0.186502	-0.0297998	0.231829	0.155891
RS15_HUMAN	40S	11	0.205	0.484	0.683	0.699	0.95	0.995	0.082	0.167	0.954	0.038	0.491	0.173	-0.17591	0.157879	0.117283	0.15995	0.067778	-0.029468	-0.240414	0.247967	0.0525085	0.514844	0.182776	0.290042
RS18_HUMAN	40S	14	0.884	0.978	0.862	0.996	0.025	0.003	0.943	0.977	0.296	0.956	0.066	0.001	0.0534265	-0.0316576	0.0566661	0.0245023	0.27905	0.240363	-0.0432106	0.0319939	0.1419	0.0604763	0.218772	0.276587
RS19_HUMAN	40S	15	0.999	0.996	0.446	0.907	0.013	0.813	0.552	0.506	0.388	0.242	0.047	0.803	0.0126626	0.017687	0.11443	-0.0670914	0.270313	0.0651218	-0.124476	0.121984	0.123559	0.225539	0.206184	0.0667264
RS2_HUMAN	40S	19	0.927	0.964	0.985	0.557	0.026	0.361	0.944	0.862	0.798	0.01	0.034	0.848	0.0429608	0.0349955	0.021117	0.0674205	0.194104	0.128997	-0.041358	0.0587582	0.0562413	0.217938	0.173813	0.0586836
RS20_HUMAN	40S	4	0.4	0.969	0.804	0.125	0.499	0.066	0.802	0.938	0.383	0.089	0.098	0.008	0.169518	-0.0333787	0.0554582	0.218959	0.100686	0.161031	-0.0967259	-0.0432382	0.105948	0.252486	0.175952	0.230834
RS21_HUMAN	40S	5	1	0.736	0.411	0.904	0.094	0.931	0.603	0.988	0.888	0.072	0.17	0.017	-0.00358314	-0.0728445	-0.135904	0.0579648	0.263276	0.0467464	-0.123379	0.0221991	-0.0582099	0.269425	0.211379	0.304933
RS23_HUMAN	40S	11	0.545	0.987	0.998	0.216	0.018	0.007	0.973	0.923	1	0.252	0.195	0.004	0.149154	-0.0276887	0.0122586	0.223573	0.310811	0.314417	0.0476824	0.0530431	-0.00440616	0.22441	0.173373	0.330602
RS25_HUMAN	40S	10	0.998	0.419	0.223	0.98	0.107	0.057	0.998	0.317	0.496	0.958	0.031	0.099	-0.0124506	0.137722	0.129783	-0.0272706	0.150296	0.295936	-0.0136078	0.157774	0.089288	0.037464	0.18297	0.26169
RS26_HUMAN	40S	6	0.282	0.953	0.924	0.979	0.052	0.089	0.999	0.998	0.768	0.364	0.087	0.112	0.24107	-0.0613175	0.0845381	0.0448764	0.37198	0.316818	0.0145329	0.0217168	0.134997	0.221006	0.313296	0.299467
RS27_HUMAN	40S	4	0.969	0.948	0.982	0.934	0.013	0.063	1	0.431	0.994	0.057	0.055	0.001	0.0811745	0.0892593	0.0721307	-0.0655199	0.441587	0.480369	0.000487966	0.271996	-0.0503062	0.371482	0.323537	0.839382
RS28_HUMAN	40S	5	0.759	0.8	0.732	0.205	0.678	0.969	0.616	0.759	1	0.079	0.86	0.946	-0.164781	-0.0939811	-0.144182	0.33061	0.252676	-0.0529616	-0.221644	0.10239	-0.0140255	0.455244	0.162786	0.0650756
RS29_HUMAN	40S	4	0.72	0.997	0.511	0.931	0.056	0.376	0.924	0.746	0.373	0.726	0.041	0.036	0.14339	0.0282674	0.184751	-0.075645	0.42788	0.187776	-0.0873509	0.151712	0.221544	0.143786	0.427815	0.365081
RS3_HUMAN	40S	25	0.905	0.846	0.471	0.991	0.217	1	0.391	0.954	0.904	0.973	0.021	0.355	-0.0508023	-0.0724084	-0.0978958	-0.0183166	0.186488	-0.000161782	-0.137625	-0.0451031	-0.0426544	0.0281144	0.299481	0.12219
RS3A_HUMAN	40S	27	0.47	0.892	0.987	0.941	0.035	0.127	0.459	0.96	0.177	0.469	0.011	0.095	-0.138178	-0.0637905	0.0204278	-0.0448702	0.280644	0.210092	-0.148744	-0.0435888	0.148009	0.132106	0.321464	0.225821
RS4X_HUMAN	40S	25	0.97	0.493	1	0.998	0.069	0.022	0.684	0.96	0.991	0.306	0.009	0.039	0.0266759	-0.0856647	0.00670846	0.0105122	0.155911	0.232414	-0.0738982	0.0275092	0.0207748	0.12593	0.209343	0.210191
RS4Y1_HUMAN	40S	11	0.512	0.738	0.232	0.946	0.007	0.101	0.866	0.911	0.68	0.182	0.077	0.055	0.178745	-0.10558	0.24987	0.0617101	0.438096	0.285186	-0.0997683	0.0665763	0.133718	0.280043	0.27357	0.326578
RS4Y2_HUMAN	40S	9	0.807	0.922	0.221	0.996	0.005	0.058	0.831	0.88	0.5	0.399	0.053	0.01	0.107553	-0.0673692	0.275244	0.027002	0.519152	0.329534	-0.107615	0.0798693	0.188046	0.232155	0.337382	0.442914
RS5_HUMAN	40S	17	0.88	1	0.661	0.998	0.007	0.48	0.976	0.452	0.516	0.299	0.099	0.227	-0.111915	-0.00502229	0.130384	-0.0144616	0.502048	0.221662	-0.0647465	0.126294	0.160645	0.189603	0.296322	0.313804
RS6_HUMAN	40S	16	0.544	0.703	0.975	0.989	0.033	0.205	0.895	0.976	0.4	0.422	0.01	0.17	-0.210388	-0.119996	0.043389	0.0292113	0.322452	0.184924	-0.111222	0.043647	0.179564	0.164906	0.368616	0.196343
RS7_HUMAN	40S	14	0.904	0.992	0.665	0.906	0.065	0.303	0.838	0.999	0.967	0.84	0.034	0.185	-0.0381675	0.0137351	-0.0609159	-0.0253548	0.120154	0.1046	-0.0501343	-0.00687546	-0.0232992	-0.0333913	0.128948	0.12516
RS8_HUMAN	40S	15	0.586	0.897	1	0.917	0.015	0.385	0.738	1	0.107	0.885	0.008	0.54	-0.0725804	-0.0414836	0.00370158	-0.0374168	0.211819	0.0898292	0.060472	-0.00542366	0.126264	0.045092	0.220101	0.0731526
RS9_HUMAN	40S	14	1	0.914	0.998	0.987	0.019	0.97	0.899	0.98	0.877	0.998	0.002	0.977	-0.00347356	-0.0537478	0.0102723	0.031763	0.244389	-0.0258975	-0.0602502	-0.0316703	0.0471192	-0.017122	0.328419	-0.0235869
RSSA_HUMAN	40S	15	1	0.471	0.845	0.954	0.773	0.292	0.458	0.917	0.649	0.986	0.135	0.463	-0.00431639	-0.09769	0.0359877	0.0301066	0.0628872	0.0617643	-0.0722059	-0.0402576	0.0528658	0.020983	0.155196	0.0491911
RL10_HUMAN	60S	14	0.728	0.876	0.757	0.838	0.428	0.041	0.097	0.203	1	0.535	0.531	0.01	0.088983	0.0424954	-0.0686185	0.0550154	0.144302	0.189709	-0.246932	0.127623	-0.000514748	0.0991158	0.11866	0.239744
RL10A_HUMAN	60S	13	0.014	0.985	0.986	0.633	0.138	0.812	0.03	1	0.853	0.998	0.619	0.998	-0.264408	0.0229284	0.0233683	-0.0975141	0.207554	0.0395541	-0.246713	-0.00639661	-0.0562802	-0.0136796	0.0977936	-0.00715236
RL13_HUMAN	60S	13	0.956	0.876	0.988	0.68	0.169	0.992	0.738	0.837	0.481	0.249	0.048	0.719	-0.0490796	-0.077206	0.0249504	-0.0843631	0.189334	0.0267878	-0.107345	-0.0867825	0.121983	0.162871	0.24178	0.105063
RL15_HUMAN	60S	16	0.245	0.911	1	0.995	0.015	0.041	0.714	0.997	0.846	0.822	0.314	0.132	0.302054	-0.0702692	-0.0112758	0.0326195	0.439075	0.345171	0.165321	0.0203772	0.08948	0.128634	0.199902	0.265024
RL18_HUMAN	60S	9	0.795	0.763	0.93	0.982	0.673	0.218	0.625	0.996	0.983	0.696	0.28	0.04	0.0629491	-0.0865043	-0.0338252	-0.0243615	0.0872479	0.14512	-0.0900277	-0.0195044	0.0200876	0.0795095	0.141505	0.220605
RL19_HUMAN	60S	13	0.963	0.647	0.711	0.582	0.184	0.001	0.966	0.994	0.649	0.104	0.057	0.001	0.0611831	-0.159199	0.147779	0.161362	0.306498	0.344411	-0.0631576	0.0333777	0.163612	0.349989	0.387176	0.357018
RL22_HUMAN	60S	6	0.596	0.92	0.999	0.959	0.32	0.875	0.932	0.994	0.603	0.995	0.641	0.899	-0.104148	-0.0696721	-0.00932681	-0.047006	0.207463	0.0611345	-0.0500769	0.0278831	0.0887376	0.0236487	0.126367	0.0561792
RL23_HUMAN	60S	11	0.98	1	0.835	0.999	0.497	0.011	0.915	0.924	0.145	0.568	0.979	0.188	-0.0351184	0.00482432	0.0559803	-0.0076644	0.11065	0.240663	-0.0631143	-0.040436	0.165283	0.0961308	-0.0268763	0.135161
RL23A_HUMAN	60S	11	0.516	0.47	0.519	0.489	0.218	0.316	0.32	0.984	0.277	0.637	0.448	0.132	-0.124219	-0.170695	0.14272	-0.102364	0.218016	0.1827	-0.170858	0.038523	0.197304	0.0883294	0.1496	0.245563
RL26_HUMAN	60S	14	0.844	0.993	0.338	0.664	0.033	0.062	0.882	0.859	0.71	0.135	0.404	0.002	0.106303	-0.029119	0.193369	0.150289	0.472101	0.37919	-0.100366	0.0889986	0.114497	0.343837	0.216721	0.63961
RL26L_HUMAN	60S	12	0.995	0.993	0.948	0.931	0.072	0.2	0.469	0.691	0.873	0.304	0.546	0.007	0.0260258	0.0306904	0.0447861	0.07739	0.40205	0.288488	-0.177518	0.129749	0.0633436	0.267288	0.178973	0.557174
RL29_HUMAN	60S	2	0.125	0.961	0.772	0.362	0.041	0.115	0.997	0.672	0.762	0.028	0.154	0.025	0.381875	-0.0609162	0.155978	0.279071	0.493193	0.385132	0.0300571	0.148266	0.159204	0.589594	0.343372	0.528538
RL3_HUMAN	60S	26	0.983	0.894	0.996	0.713	0.377	0.073	0.943	0.991	0.921	0.018	0.63	0.104	-0.0320102	-0.0545312	0.013524	0.0440248	0.138926	0.230786	-0.0522983	0.0220099	0.0390782	0.165593	0.0929766	0.212731
RL30_HUMAN	60S	6	0.909	0.796	0.979	0.975	0.708	0.583	0.977	0.828	0.577	0.979	0.221	0.043	0.0906131	-0.0920835	0.0289568	-0.0363523	0.119877	0.103228	0.057609	0.0852272	0.100814	0.0361637	0.225016	0.254901
RL35_HUMAN	60S	9	0.11	0.954	0.789	1	0.867	0.136	0.683	0.733	0.206	0.008	0.449	0.332	0.303592	-0.0471175	0.131198	0.00195786	0.0914499	0.319529	-0.1372	0.0966113	0.312558	0.417625	0.178608	0.23418
RL35A_HUMAN	60S	9	0.32	0.722	0.646	0.974	0.098	0.089	0.966	0.654	0.182	0.654	0.379	0.024	0.287452	-0.104149	0.142725	-0.0712139	0.335502	0.33063	0.0736008	0.11649	0.273733	0.218545	0.200347	0.429962
RL36A_HUMAN	60S	7	0.14	0.939	0.483	0.501	0.047	0.459	0.918	0.92	0.995	0.053	0.267	0.249	0.530449	-0.13968	0.385127	0.346916	0.563998	0.224922	0.142182	0.154967	-0.0579003	0.781802	0.334651	0.299046
RL36L_HUMAN	60S	5	0.021	0.996	0.999	0.64	0.157	0.04	0.9	0.446	0.392	0.048	0.66	0.004	0.717038	-0.039696	0.0259159	0.276562	0.444323	0.461952	-0.139908	0.288828	-0.321665	0.774567	0.204251	0.650096
RL37_HUMAN	60S	6	0.009	0.995	0.964	0.568	0.214	0.959	0.288	0.313	0.607	0.076	0.94	0.07	1.0064	0.111234	0.232439	0.330254	0.797683	0.125665	0.427275	0.901964	-0.64846	0.660487	0.175216	0.785573
RL3L_HUMAN	60S	3	0.803	0.851	0.155	0.988	1	0.092	0.781	0.991	0.007	1	0.981	0.036	0.180426	-0.150476	0.353536	0.0700413	0.000965439	0.38226	0.200644	-0.0530364	0.636134	0.0155761	-0.0602251	0.463193
RL5_HUMAN	60S	19	0.994	0.656	0.437	0.982	0.146	0.76	0.195	0.202	0.242	0.349	0.383	0.384	-0.0272614	0.106297	0.141411	-0.0427469	0.274469	0.121625	-0.264823	0.200373	0.184569	0.224635	0.180821	0.211648
RL6_HUMAN	60S	22	0.963	0.792	0.415	0.888	0.001	0.083	0.745	0.995	0.456	0.694	0.003	0.141	-0.0318591	-0.0568219	0.101242	0.0409002	0.216406	0.185458	-0.0734084	0.0140489	0.0959683	0.0679627	0.180436	0.162217
RL7_HUMAN	60S	19	0.624	0.828	0.85	0.219	0.29	0.499	0.236	0.949	0.152	0.224	0.015	0.639	-0.0567491	-0.0539663	0.0412821	-0.162726	0.126208	0.0871894	-0.102395	0.033292	0.125341	-0.171273	0.238594	0.0716898
RL9_HUMAN	60S	12	0.868	0.591	1	0.578	0.574	0.37	0.985	0.608	0.158	0.637	0.239	0.173	-0.0437188	-0.0650409	0.00231649	-0.0712118	0.0804144	0.0831971	-0.0206556	0.0634769	0.0973957	-0.0693631	0.119474	0.111242
RLA2_HUMAN	60S	8	0.696	0.991	0.429	0.218	0.891	0.369	0.996	0.94	0.047	0.987	0.974	0.951	-0.121429	-0.0465026	0.148226	0.339306	0.0905304	0.235672	0.025698	-0.0899796	0.293547	-0.0529305	0.0501633	0.0697678

## Sheet: Metabolites&Lipids
Table S2. Metabolite & lipid data for multi-omic measurements resulting from MPLEx extraction of influenza infected Calu-3 cells
	PVALUE (MOCK VS VIRUS)												LOG 2 FOLD CHANGE (MOCK / VIRUS)
LIPID	FM 0h	FM 3h	FM 7h	FM 12h	FM 18h	FM 24h	AH1 0h	AH1 3h	AH1 7h	AH1 12h	AH1 18h	AH1 24h	FM 0h	FM 3h	FM 7h	FM 12h	FM 18h	FM 24h	AH1 0h	AH1 3h	AH1 7h	AH1 12h	AH1 18h	AH1 24h
myristic acid (14:0)	0.000881338	0.990773	0.997659	0.18061	1.04558e-05	0.0369351	0.840171	0.996636	0.0272062	0.811981	0.0414679	0.999969	-1.10759	0.0803209	0.0623124	-0.43491	1.33633	-0.645326	-0.163494	0.0569248	-1.22928	-0.166279	0.521616	-0.00808949
oleic acid (18:1)	0.99724	0.621866	0.845909	0.315138	0.000782592	0.964764	0.954222	0.957034	0.00228934	0.857953	0.00154988	0.900172	-0.038613	0.278591	-0.173897	-0.488755	1.02453	-0.122351	-0.102648	0.110313	-1.07488	-0.203056	0.950629	-0.181048
Cer(d18:0/24:0)	0.937738	0.998651	0.28432	0.747495	0.0292156	6.91165e-06	0.62653	0.920998	0.745949	0.0290046	0.0042483	4.10766e-05	-0.149908	0.0248794	0.268836	-0.138147	0.760292	2.15055	0.32763	0.103359	0.138552	0.478476	1.00968	1.7954
Cer(d18:0/24:1)	0.0824308	0.726329	0.870626	0.00569231	0.00285467	0.00305751	0.662653	0.969292	0.925139	0.0483271	0.0497549	0.105755	-0.459625	0.229588	-0.231965	-0.784596	0.882286	0.975595	-0.188886	0.0952938	0.186776	-0.559055	0.572981	0.540599
